# Supplementary material for: ROS-mediated liposomal dexamethasone: a new FA-targeted nanoformulation to combat rheumatoid arthritis via inhibiting iRhom2/TNF-α/BAFF pathways
Source: Royal Society of Chemistry journal article supplement (doi:10.1039/d1nr05518f), 2021-01-01
Supplement: d1nr05518f1.pdf [file d1nr05518f1.pdf]

## Supporting Information

### ROS-mediated liposomal dexamethasone: a new FA-targeted nanoformulation to combat rheumatoid arthritis *via* inhibiting iRhom2/TNF- $\alpha$ /BAFF pathways

Yanqin Song<sup>a, b</sup>, Muhammad Ismail<sup>c</sup>, Qi Shan<sup>a</sup>, Jianing Zhao<sup>a</sup>, Yanping Zhu<sup>a</sup>, Leiming Zhang<sup>a</sup>, Yuan Du<sup>a, \*</sup>, Longbing Ling<sup>a, \*</sup>

<sup>a</sup> Key Laboratory of Molecular Pharmacology and Drug Evaluation (Ministry of Education of China), School of Pharmacy, Yantai University, Yantai 264005, China

<sup>b</sup> Yantai Center for Food and Drug Control, Yantai 264005, China

<sup>c</sup> Henan-Macquarie University Joint Center for Biomedical Innovation, School of Life Science, Henan University, Kaifeng, Henan 475004, China

\* Corresponding author: Yuan Du, Ph D, Email: duyuan@ytu.edu.cn

Longbing, Ling, Ph D, Email: linglongbing@ytu.edu.cn

### Supplementary Figures

**Scheme S1.** Synthetic route of di-S-PC lipids.

**Figure S1.** (a) <sup>1</sup>H NMR and (b) <sup>13</sup>C NMR (600 MHz, CDCl<sub>3</sub>) spectra of C<sub>18</sub>-S-COOH intermediate.

**Figure S2.** <sup>1</sup>H NMR (600 MHz, CDCl<sub>3</sub>) spectrum of ROS-responsive di-S-PC lipids.

**Figure S3.** <sup>13</sup>C NMR (600 MHz, CH<sub>3</sub>OH-*d*<sub>4</sub>) spectrum of ROS-responsive di-S-PC lipids.

**Figure S4.** The *in vitro* cellular association of Dex@FA-ROS-Lips. Confluent LPS-activated RAW264.7 cells exposed to free Dex solution or liposomes containing Dex (50  $\mu$ M) at various time intervals.

**Figure S5.** (a) Expression levels and (b) the quantified densitometric analysis of iRhom2, TNF- $\alpha$  and BAFF proteins detected by Western blotting ( $n = 3$ ).  $\beta$ -actin antibody was used to ensure after incubation equal protein loading. Data are presented as Mean  $\pm$  S.D. and were statistically analyzed by one-way ANOVA. \*\* $P < 0.01$  vs the control group; \* $P < 0.05$ , \*\* $P < 0.01$  vs free Dex group.

**Figure S6.** (a) Schematic representation of AIA mice model protocol. 100  $\mu$ L of CFA with the heat-killed mycobacteria (10 mg/mL) was injected subcutaneously into SD males on day 0; (b) Arthritis first signs appeared 14 days after the first immunization step; (c) Hind paws and fore paws images according to the inflammation visual scores shown in table.

**Figure S7.** Hemolysis of Dex@FA-ROS-Lips: (a) Micrograph of RBCs exposed to 250  $\mu$ g/mL ROS-Lips and Dex@FA-ROS-Lips after incubated at 37  $^{\circ}$ C for 2 h. 0.9%

saline (0% hemolysis) and distilled water (100% hemolysis) was set as negative and positive controls; (b) Images of tubes containing red blood cells (RBCs) incubated with different groups (after  $3000 \times$  centrifugation); (c) Hemolysis rate (%) of tested liposomes and the value less than 5% was considered safe for *in vivo* administration.

**Scheme S1.** Synthetic route of di-S-PC lipids.

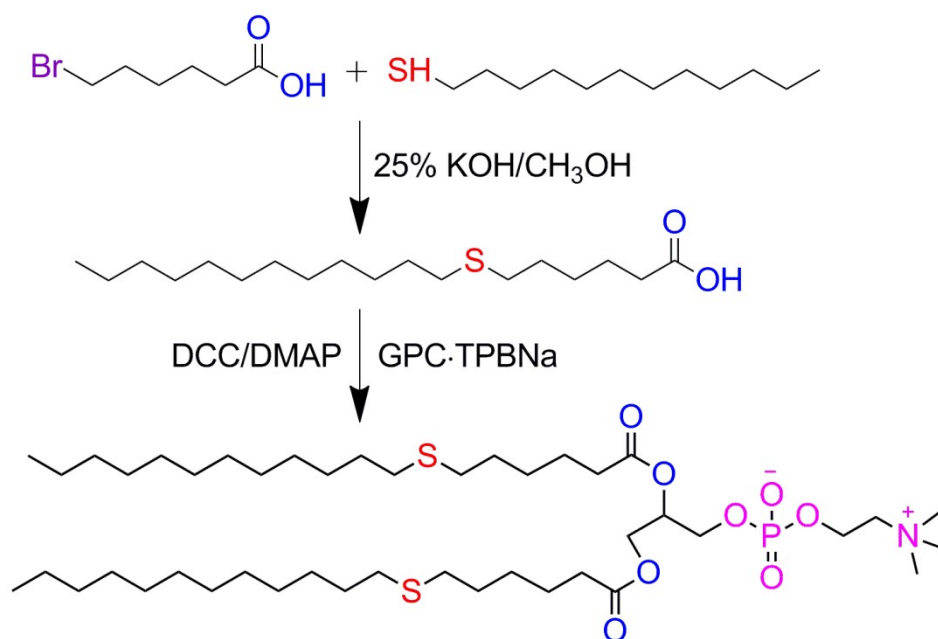

As shown, ROS-responsive lipids (di-S-PC) were synthesized by a two-step reaction that C18-S-COOH intermediate was firstly prepared by conjugation between 6-Bromohexanoic acid and 1-Dodecanethiol in the presence of 25% KOH and further attached to GPC-TPBNa using DCC/DMAP condensation system.

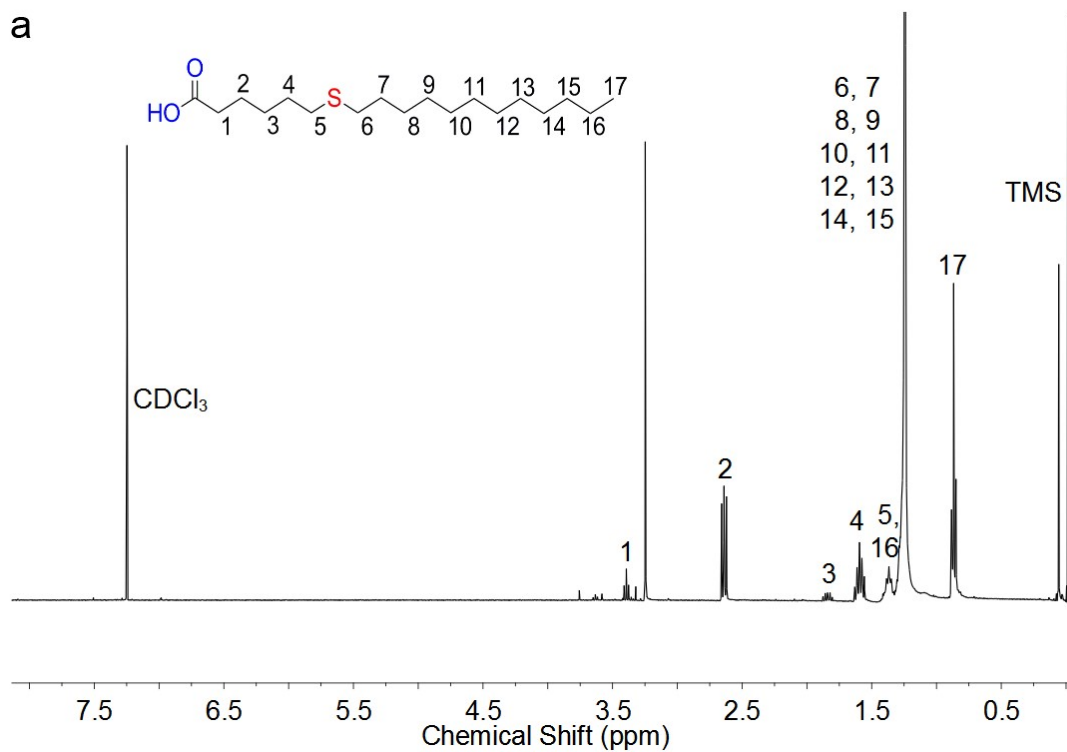

b

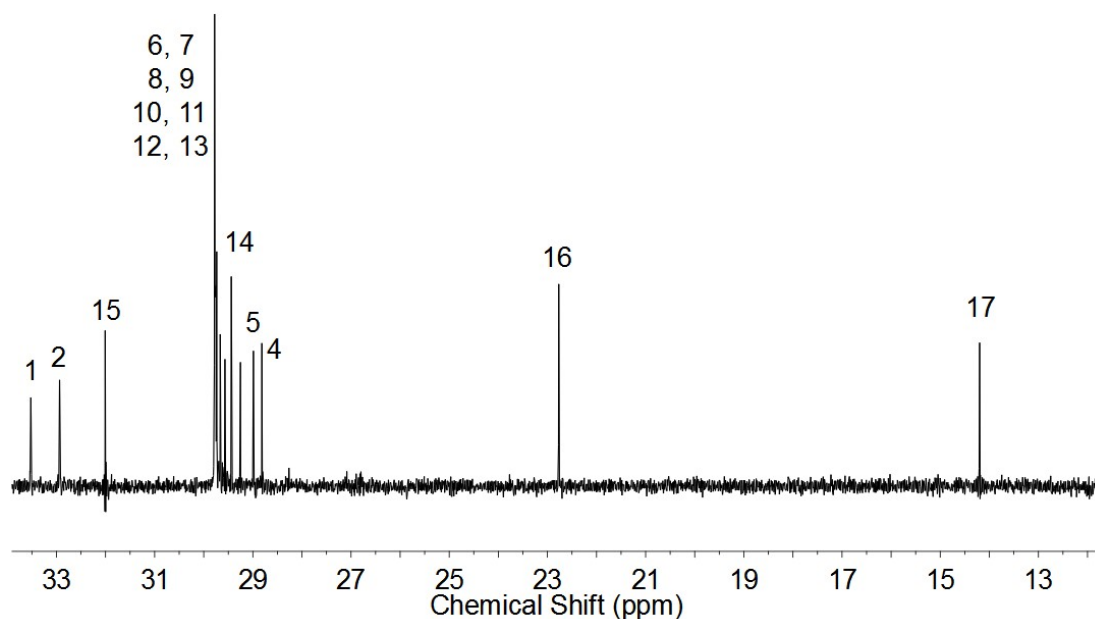

**Figure S1.** (a) <sup>1</sup>H NMR and (b) <sup>13</sup>C NMR (600 MHz, CDCl<sub>3</sub>) spectra of C<sub>18</sub>-S-COOH intermediate.

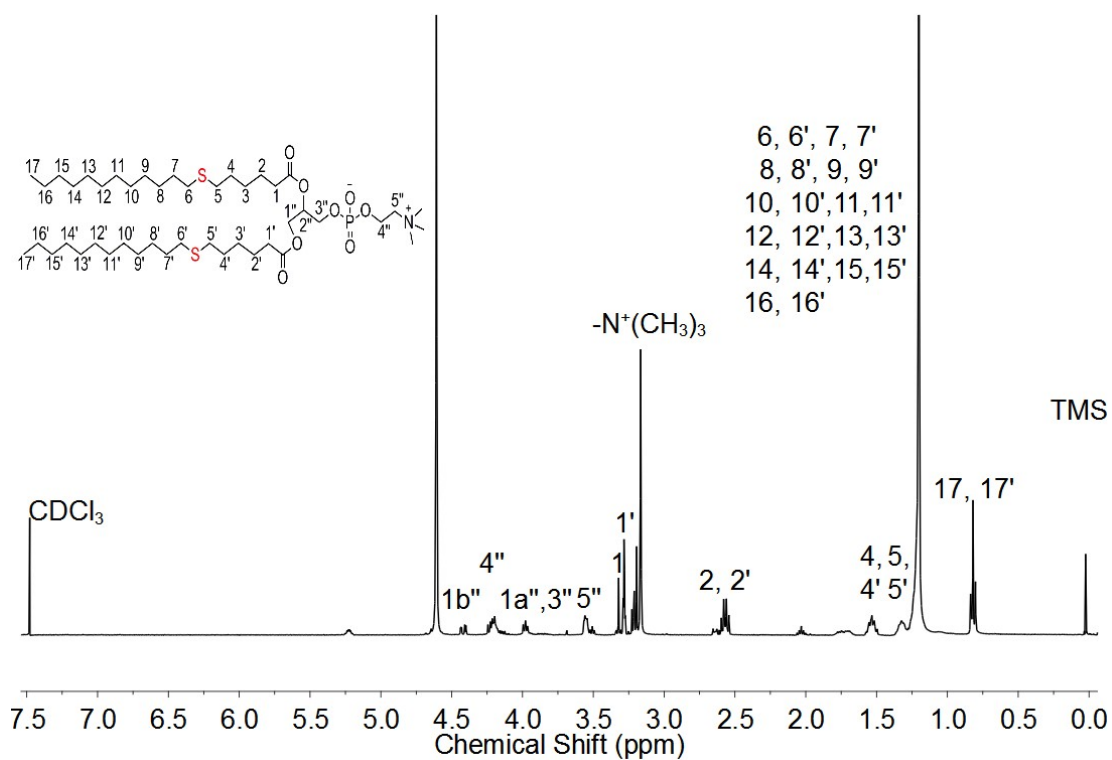

**Figure S2.** <sup>1</sup>H NMR (600 MHz, CDCl<sub>3</sub>) spectrum of ROS-responsive di-S-PC lipids. <sup>1</sup>H NMR (600 MHz, CDCl<sub>3</sub>): δ 5.40 (s, 1H, H-2''), 4.48 (d, J=6.4 Hz, 1H, H-1b''), 4.36

(m, 2H, H-4''), 4.14 (m, 1H, H-1a''), 3.53 (m, 4H, H-3'', 5''), 3.46 (s, 4H, H-1, 1'), 3.25 (s, 9H, -N<sup>+</sup>(CH<sub>3</sub>)<sub>3</sub>), 2.61 (m, 4H, H-2, 2'), 1.46-1.25 (m, -CH<sub>2</sub>-), 0.92 (m, 6H, H-17, 17') ppm.

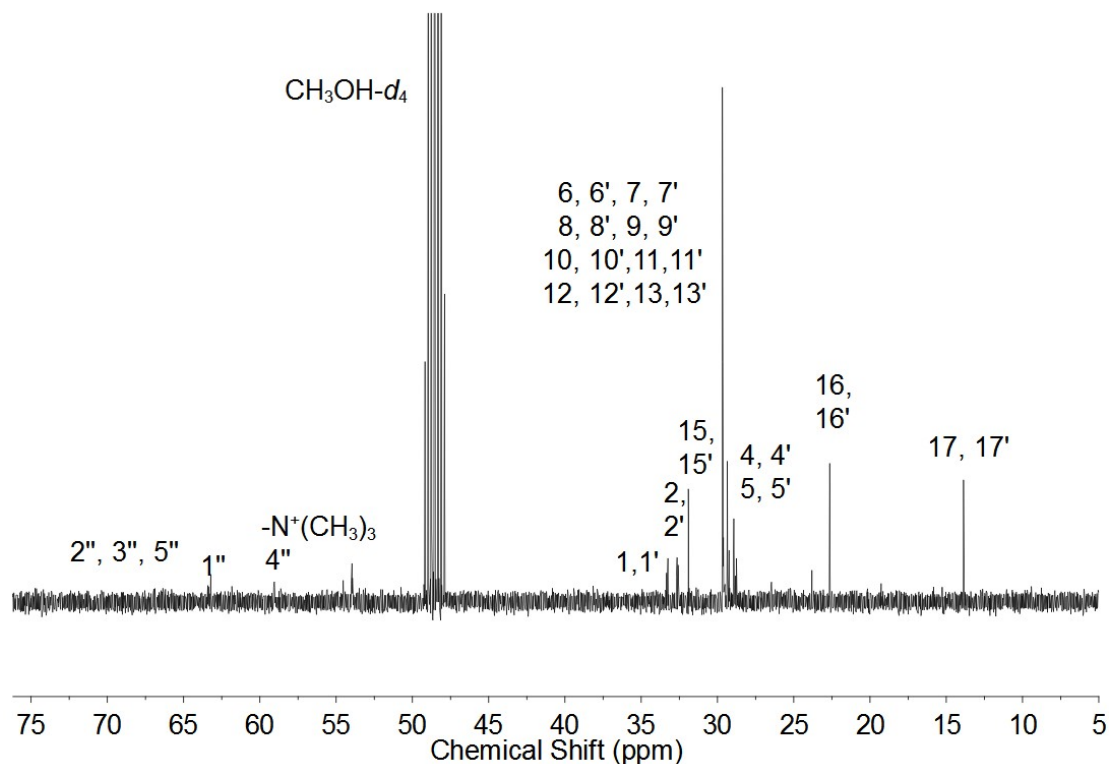

**Figure S3.** <sup>13</sup>C NMR (600 MHz, CH<sub>3</sub>OH-*d*<sub>4</sub>) spectrum of ROS-responsive di-S-PC lipids. <sup>13</sup>C NMR (500 MHz, CH<sub>3</sub>OH-*d*<sub>4</sub>): δ 77.82, 77.50, 77.17, 53.96, 49.18, 33.25, 32.65, 31.91, 29.77, 29.02, 22.64, 13.87 ppm.

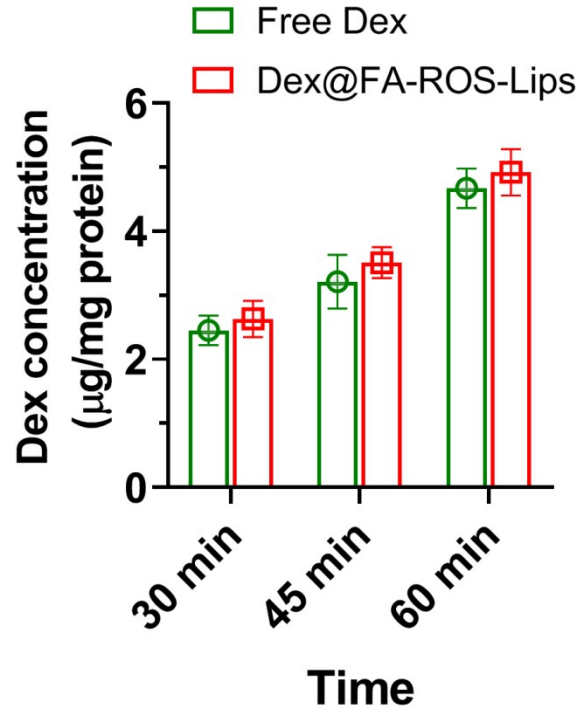

**Figure S4.** The *in vitro* cellular association of Dex@FA-ROS-Lips. Confluent LPS-activated RAW264.7 cells exposed to free Dex solution or liposomes containing Dex (50 µM) at various time intervals.

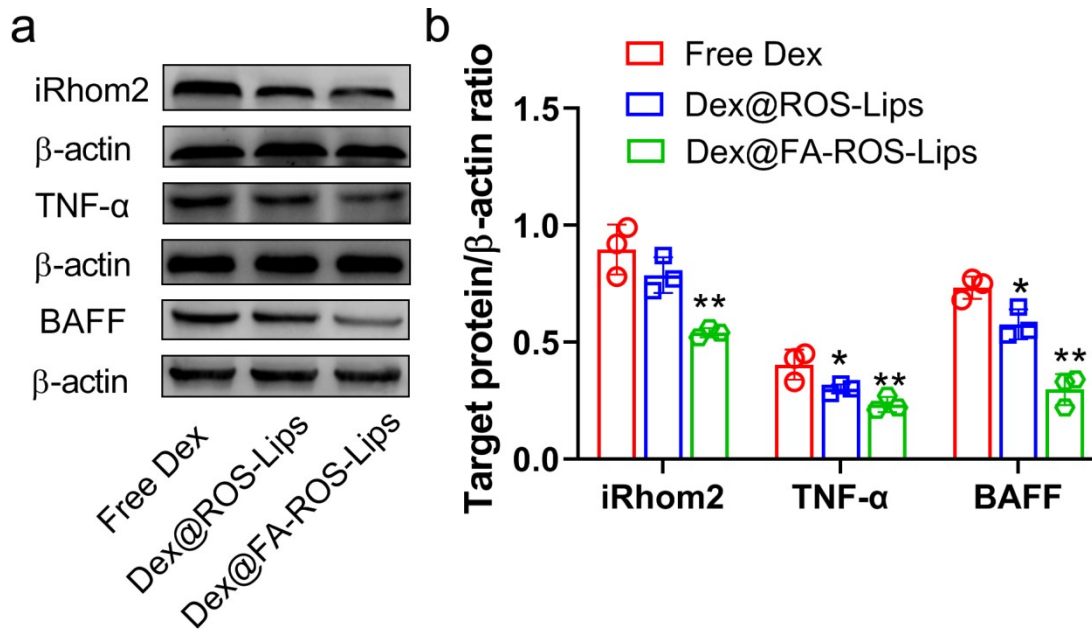

**Figure S5.** (a) Expression levels and (b) the quantified densitometric analysis of iRhom2, TNF-α and BAFF proteins detected by Western blotting ( $n = 3$ ). β-actin antibody was used to ensure after incubation equal protein loading. Data are presented as Mean ± S.D. and were statistically analyzed by one-way ANOVA. \*\* $P < 0.01$  vs

the control group; \* $P < 0.05$ , \*\* $P < 0.01$  vs free Dex group.

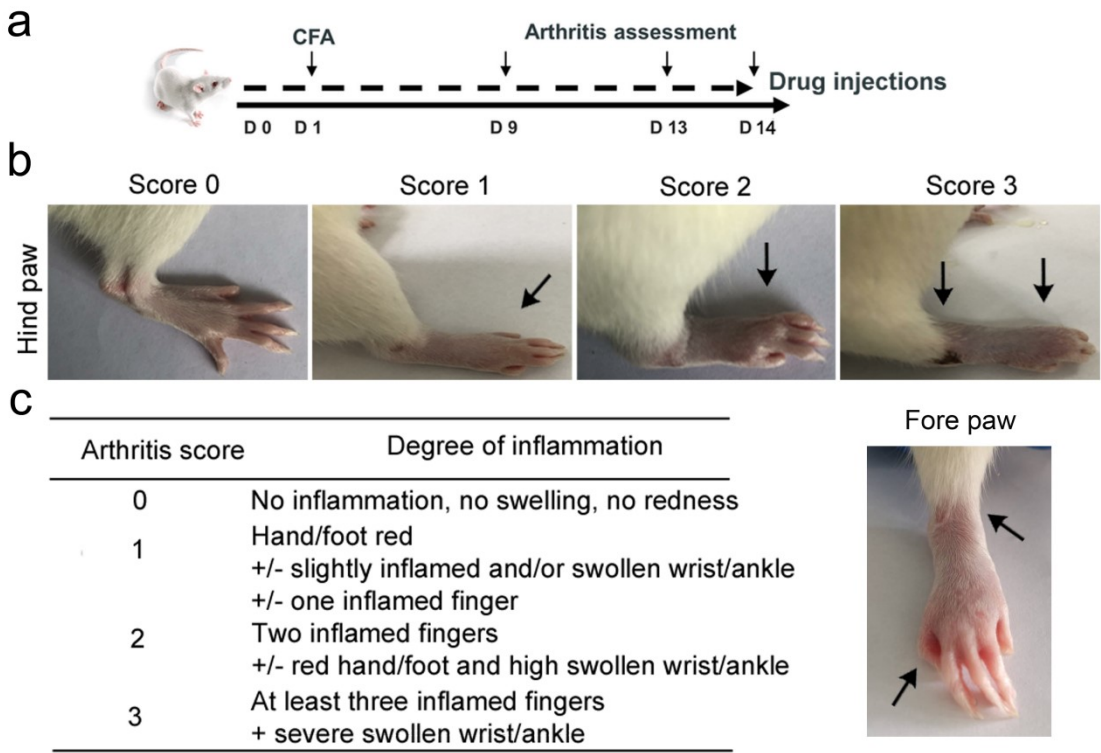

**Figure S6.** (a) Schematic representation of AIA mice model protocol. 100  $\mu$ L of CFA with the heat-killed mycobacteria (10 mg/mL) was injected subcutaneously into SD males on day 0; (b) Arthritis first signs appeared 14 days after the first immunization step; (c) Hind paws and fore paws images according to the inflammation visual scores shown in table.

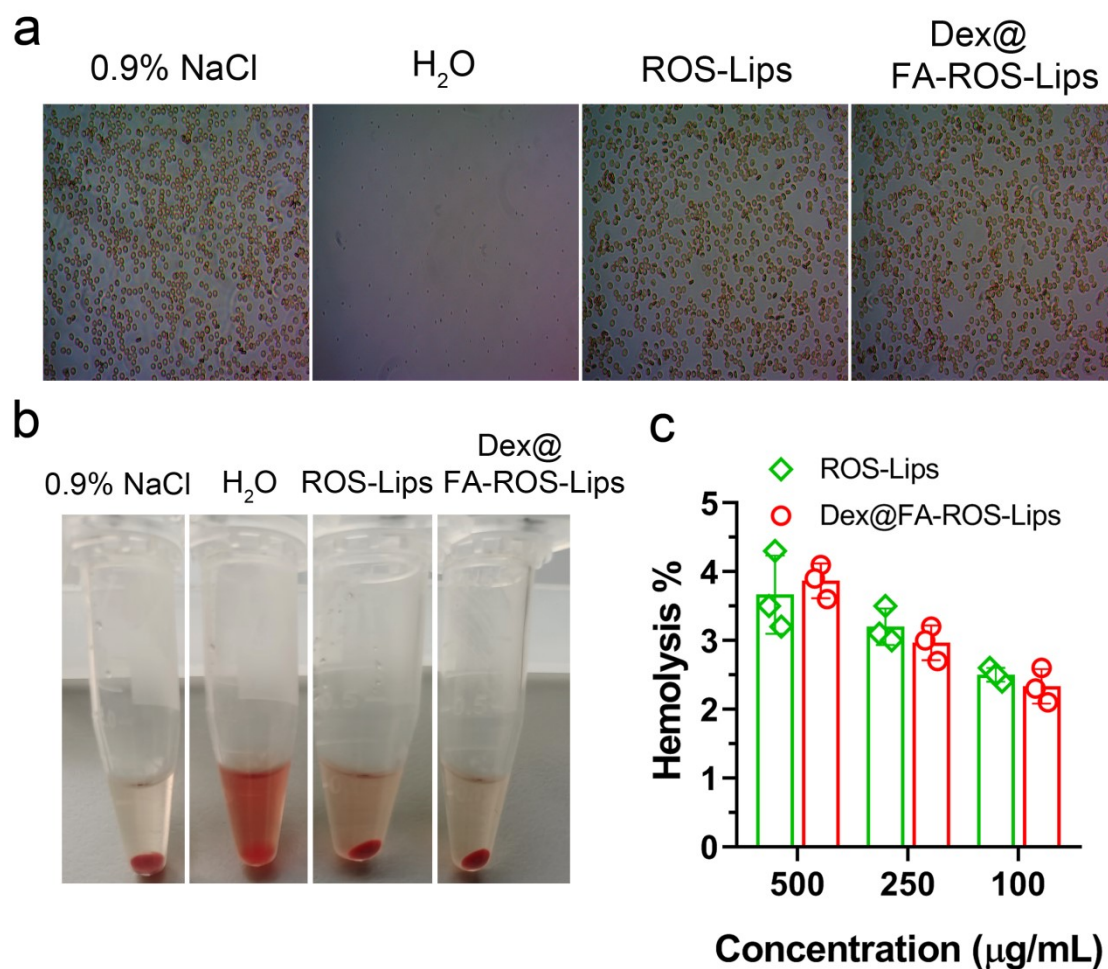

**Figure S7.** Hemolysis of Dex@FA-ROS-Lips: (a) Micrograph of RBCs exposed to 250 µg/mL ROS-Lips and Dex@FA-ROS-Lips after incubated at 37 °C for 2 h. 0.9% saline (0% hemolysis) and distilled water (100% hemolysis) was set as negative and positive controls; (b) Images of tubes containing red blood cells (RBCs) incubated with different groups (after 3000 × centrifugation); (c) Hemolysis rate (%) of tested liposomes and the value less than 5% was considered safe for *in vivo* administration.
